# Supplementary material for: Production of cellulose nanofibrils and films from elephant grass using deep eutectic solvents and a solid acid catalyst
Source: Royal Society of Chemistry journal article supplement (doi:10.1039/d1ra02259h), 2021-01-01
Supplement: d1ra02259h1.pdf [file d1ra02259h1.pdf]

## Supporting Information

### **Production of cellulose nanofibrils and films from elephant grass using deep eutectic solvents and solid acid catalyst**

Xi-Que Wu<sup>a</sup>, Pan-Dao Liu<sup>b</sup>, Qun Liu<sup>a</sup>, Shu-Ying Xu<sup>a</sup>, Yu-Cang Zhang<sup>c</sup>,

Wen-Rong Xu<sup>a,\*</sup>, Guo-Dao Liu<sup>b,\*</sup>

<sup>a</sup> Key Laboratory of Advanced Materials of Tropical Island Resources of Ministry of Education, Hainan Provincial Key Laboratory of Fine Chemistry, Key Laboratory of Solid Waste Resource Utilization and Environmental Protection, School of Science, School of Chemical Engineering and Technology, Hainan University, Haikou 570228, PR China

<sup>b</sup> Institute of Tropical Crop Genetic Resources, Chinese Academy of Tropical Agriculture Sciences, Haikou 571101, PR China

<sup>c</sup> College of Food and Biological Engineering, Jimei University, Xiamen 361021, PR China

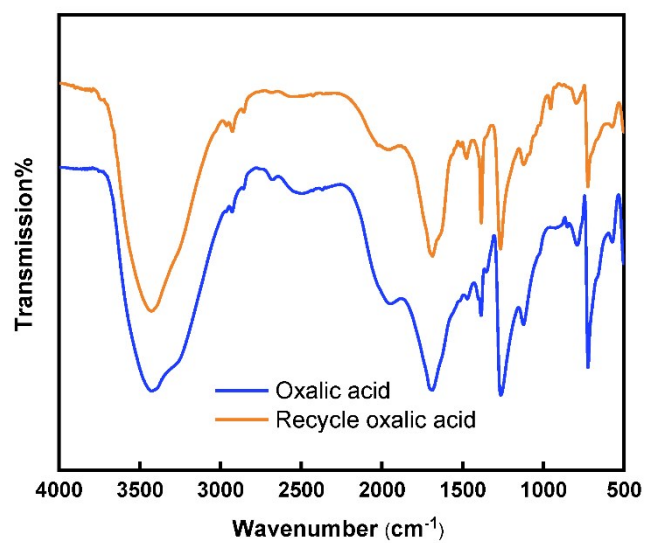

**Fig. S1.** FTIR spectra of oxalic acid and recycle oxalic acid dihydrate.

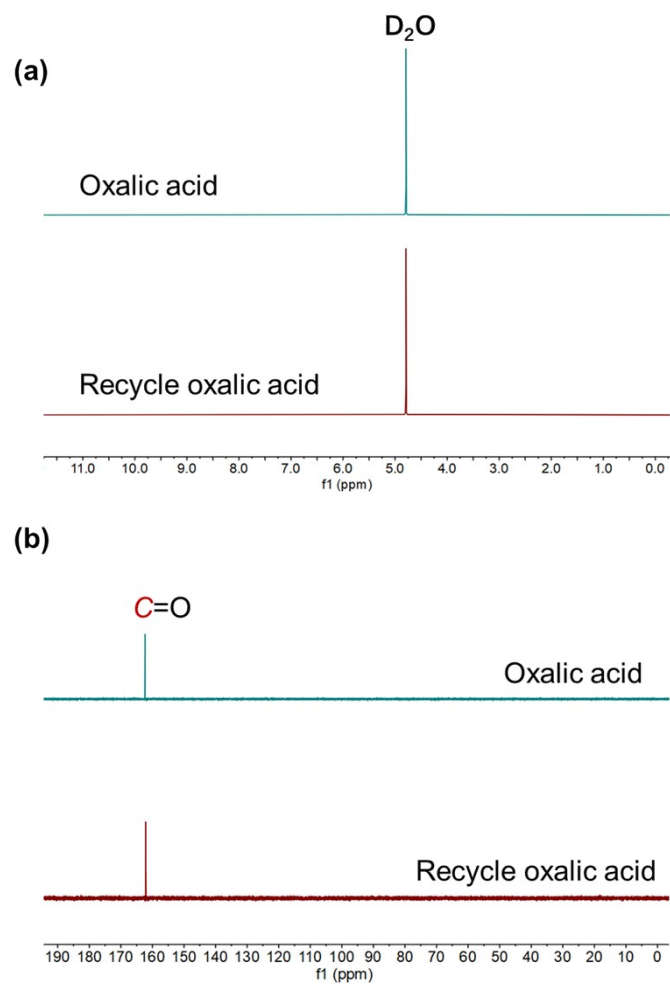

**Fig. S2.** <sup>1</sup>H NMR spectra (a) and <sup>13</sup>C NMR spectra (b) of oxalic acid and recycle oxalic acid dihydrate.
